# Supplementary material
Source: MDPI journal article supplement (https://www.mdpi.com/2073-4441/15/23/4187)
Supplement: s1 [file s1]

## Supplementary Material

**Table S1.** Changes in growth values according to irrigation applications in *Salvia splendens* L. and multiple comparison test

| Growth Parameters                     | Irrigation Application | Growth Values | Duncan $\pm$ Standard Deviation |
|---------------------------------------|------------------------|---------------|---------------------------------|
| Number of Flowers (30th days), pieces | %25                    | 0.00          | 0.00 <sup>bc</sup> $\pm$ 0.00   |
|                                       | %50                    | 0.50          | 0.50 <sup>b</sup> $\pm$ 0.54    |
|                                       | %75                    | 1.00          | 1.00 <sup>a</sup> $\pm$ 0.00    |
|                                       | %100                   | 0.33          | 0.33 <sup>bc</sup> $\pm$ 0.51   |
| Number of Flowers (55th days), pieces | %25                    | 0.83          | 0.83 <sup>b</sup> $\pm$ 0.41    |
|                                       | %50                    | 1.00          | 1.00 <sup>b</sup> $\pm$ 0.00    |
|                                       | %75                    | 2.83          | 2.83 <sup>a</sup> $\pm$ 1.33    |
|                                       | %100                   | 1.33          | 1.33 <sup>b</sup> $\pm$ 0.51    |
| Flower Stem Thickness (30th day), mm  | %25                    | 3.08          | 3.08 <sup>b</sup> $\pm$ 1.52    |
|                                       | %50                    | 4.45          | 4.45 <sup>a</sup> $\pm$ 0.96    |
|                                       | %75                    | 5.03          | 5.03 <sup>a</sup> $\pm$ 0.41    |
|                                       | %100                   | 4.38          | 4.38 <sup>a</sup> $\pm$ 0.99    |
| Flower Stem Thickness (55th day), mm  | %25                    | 2.97          | 2.97 <sup>c</sup> $\pm$ 1.80    |
|                                       | %50                    | 4.65          | 4.65 <sup>b</sup> $\pm$ 0.41    |
|                                       | %75                    | 6.26          | 6.26 <sup>a</sup> $\pm$ 0.69    |
|                                       | %100                   | 5.55          | 5.55 <sup>ab</sup> $\pm$ 0.78   |
| Flower Diameter (30th day), mm        | %25                    | 0.00          | 0.00 <sup>b</sup> $\pm$ 0.00    |
|                                       | %50                    | 11.75         | 11.75 <sup>ab</sup> $\pm$ 15.20 |
|                                       | %75                    | 22.05         | 22.05 <sup>a</sup> $\pm$ 12.47  |
|                                       | %100                   | 6.71          | 6.71 <sup>b</sup> $\pm$ 10.40   |
| Flower Diameter (55th day), mm        | %25                    | 9.68          | 9.68 <sup>c</sup> $\pm$ 6.83    |
|                                       | %50                    | 36.79         | 36.79 <sup>b</sup> $\pm$ 12.99  |
|                                       | %75                    | 67.47         | 67.47 <sup>a</sup> $\pm$ 13.55  |
|                                       | %100                   | 64.21         | 64.21 <sup>a</sup> $\pm$ 22.05  |
| Flower Height (30th day), mm          | %25                    | 0.00          | 0.00 <sup>b</sup> $\pm$ 0.00    |
|                                       | %50                    | 9.78          | 9.78 <sup>b</sup> $\pm$ 14.99   |
|                                       | %75                    | 31.74         | 31.74 <sup>a</sup> $\pm$ 14.53  |
|                                       | %100                   | 13.16         | 13.16 <sup>b</sup> $\pm$ 15.17  |
| Flower Height (55th day), mm          | %25                    | 16.97         | 16.97 <sup>c</sup> $\pm$ 10.41  |
|                                       | %50                    | 53.29         | 53.29 <sup>b</sup> $\pm$ 19.44  |
|                                       | %75                    | 133.86        | 133.86 <sup>a</sup> $\pm$ 21.17 |
|                                       | %100                   | 114.41        | 114.41 <sup>a</sup> $\pm$ 22.74 |
| Flower Fresh Weight (55th day), grams | %25                    | 0.08          | 0.08 <sup>b</sup> $\pm$ 0.06    |
|                                       | %50                    | 1.03          | 1.03 <sup>b</sup> $\pm$ 0.60    |
|                                       | %75                    | 3.10          | 3.10 <sup>a</sup> $\pm$ 1.18    |
|                                       | %100                   | 3.64          | 3.64 <sup>a</sup> $\pm$ 1.68    |
| Flower Dry Weight, grams              | %25                    | 0.07          | 0.07 <sup>c</sup> $\pm$ 0.05    |
|                                       | %50                    | 0.40          | 0.40 <sup>b</sup> $\pm$ 0.22    |
|                                       | %75                    | 0.68          | 0.68 <sup>a</sup> $\pm$ 0.29    |
|                                       | %100                   | 0.46          | 0.46 <sup>ab</sup> $\pm$ 0.18   |
| Leaf Chlorophyll Value (30th day)     | %25                    | 44.50         | 44.50 <sup>a</sup> $\pm$ 22.03  |
|                                       | %50                    | 50.51         | 50.51 <sup>a</sup> $\pm$ 2.99   |

|                                              |      |        |                             |
|----------------------------------------------|------|--------|-----------------------------|
|                                              | %75  | 44.38  | 44.38 <sup>a</sup> ± 4.65   |
|                                              | %100 | 37.85  | 37.85 <sup>a</sup> ± 6.47   |
| Leaf Chlorophyll Value (55th day)            | %25  | 0.00   | 0.00 <sup>c</sup> ± 0.00    |
|                                              | %50  | 50.78  | 50.78 <sup>a</sup> ± 7.99   |
|                                              | %75  | 40.78  | 40.78 <sup>b</sup> ± 5.90   |
|                                              | %100 | 35.26  | 35.26 <sup>b</sup> ± 2.28   |
| Plant Height (30th day), cm                  | %25  | 5.12   | 5.12 <sup>c</sup> ± 3.00    |
|                                              | %50  | 10.72  | 10.72 <sup>ab</sup> ± 2.70  |
|                                              | %75  | 13.11  | 13.11 <sup>a</sup> ± 2.48   |
|                                              | %100 | 8.98   | 8.98 <sup>b</sup> ± 2.28    |
| Plant Height (55th day), cm                  | %25  | 5.95   | 5.95 <sup>c</sup> ± 3.31    |
|                                              | %50  | 16.25  | 16.25 <sup>b</sup> ± 1.37   |
|                                              | %75  | 24.38  | 24.38 <sup>a</sup> ± 2.04   |
|                                              | %100 | 22.31  | 22.31 <sup>a</sup> ± 2.82   |
| Plant Diameter (30th day), cm                | %25  | 9.45   | 9.45 <sup>b</sup> ± 4.95    |
|                                              | %50  | 15.60  | 15.60 <sup>a</sup> ± 2.28   |
|                                              | %75  | 16.80  | 16.80 <sup>a</sup> ± 1.56   |
|                                              | %100 | 13.25  | 13.25 <sup>ab</sup> ± 3.25  |
| Plant Diameter (55th day), cm                | %25  | 4.5    | 4.5 <sup>b</sup> ± 2.32     |
|                                              | %50  | 15.0   | 15.0 <sup>a</sup> ± 1.58    |
|                                              | %75  | 17.50  | 17.50 <sup>a</sup> ± 3.28   |
|                                              | %100 | 16.25  | 16.25 <sup>a</sup> ± 1.93   |
| Vegetative Part Wet Weight (55th day), grams | %25  | 0.96   | 0.96 <sup>c</sup> ± 0.54    |
|                                              | %50  | 8.94   | 8.94 <sup>b</sup> ± 2.73    |
|                                              | %75  | 12.86  | 12.86 <sup>a</sup> ± 3.91   |
|                                              | %100 | 9.08   | 9.08 <sup>b</sup> ± 2.07    |
| Vegetative Part Dry Weight, grams            | %25  | 0.64   | 0.64 <sup>c</sup> ± 0.34    |
|                                              | %50  | 1.86   | 1.86 <sup>ab</sup> ± 0.68   |
|                                              | %75  | 2.18   | 2.18 <sup>a</sup> ± 0.72    |
|                                              | %100 | 1.38   | 1.38 <sup>b</sup> ± 0.37    |
| Number of Plant Shoots (55th day), pieces    | %25  | 0.00   | 0.00 <sup>b</sup> ± 0.00    |
|                                              | %50  | 8.50   | 8.50 <sup>a</sup> ± 1.76    |
|                                              | %75  | 9.00   | 9.00 <sup>a</sup> ± 2.68    |
|                                              | %100 | 10.17  | 10.17 <sup>a</sup> ± 2.40   |
| Leaf Area, mm <sup>2</sup>                   | %25  | 0.00   | 0.00 <sup>b</sup> ± 0.0     |
|                                              | %50  | 165.27 | 165.27 <sup>a</sup> ± 69.96 |
|                                              | %75  | 260.44 | 260.44 <sup>a</sup> ± 90.07 |
|                                              | %100 | 187.50 | 187.50 <sup>a</sup> ± 66.09 |
| Number of Buds (55th day), pieces            | %25  | 0.0    | 0.0 <sup>a</sup> ± 0.00     |
|                                              | %50  | 0.16   | 0.16 <sup>a</sup> ± 0.41    |
|                                              | %75  | 0.66   | 0.66 <sup>a</sup> ± 0.81    |
|                                              | %100 | 0.33   | 0.33 <sup>a</sup> ± 0.81    |
| Root Length (55th day), cm                   | %25  | 19.53  | 19.53 <sup>b</sup> ± 10.11  |
|                                              | %50  | 29.83  | 29.83 <sup>a</sup> ± 3.53   |
|                                              | %75  | 33.68  | 33.68 <sup>a</sup> ± 3.83   |
|                                              | %100 | 31.22  | 31.22 <sup>a</sup> ± 3.76   |
| Root Fresh Weight (55th day), grams          | %25  | 3.29   | 3.29 <sup>b</sup> ± 1.68    |
|                                              | %50  | 13.41  | 13.41 <sup>a</sup> ± 2.51   |
|                                              | %75  | 19.51  | 19.51 <sup>a</sup> ± 7.16   |
|                                              | %100 | 15.49  | 15.49 <sup>a</sup> ± 5.89   |
| Root Dry Weight, grams                       | %25  | 0.86   | 0.86 <sup>b</sup> ± 0.86    |
|                                              | %50  | 1.87   | 1.87 <sup>ab</sup> ± 0.35   |
|                                              | %75  | 2.66   | 2.66 <sup>a</sup> ± 1.03    |
|                                              | %100 | 1.56   | 1.56 <sup>ab</sup> ± 1.56   |

Note: Lowercase letters (a, b, c) represent difference. Same letters represent close values.
